# Supplementary material for: Development and Structural Variety of the Chondroitin Sulfate Proteoglycans-Contained Extracellular Matrix in the Mouse Brain
Source: Hindawi journal article supplement (doi:10.1155/2015/256389), 2015-01-01

### **Supplementary information**

Figure S1. Confirmation of WFA specificity for CS by treating sections with ChABC. (A-H) WFA-labeled images after treatment without (-) (left column) and with (+) (right column) ChABC. Pictures of (A-G) and (H) were from sections at 11w and P7, respectively. Note that WFA reactivity was almost completely abolished after ChABC treatment at 11w (A-G), while small dot-like reactivity (arrowheads, H) had not disappeared following the same treatment. Arc, arcuate nucleus; ChABC, chondroitinase ABC; Gi, gigantocellular nucleus; Hc, hippocampus; IC, inferior colliculus; Pir, piriform cortex; Rt, reticular thalamic nucleus; S1, primary somatosensory cortex; VMH, ventromedial hypothalamic nucleus. Scale bars = 500 (A-G) and 250 (H)  $\mu\text{m}$ .

Fig. S1

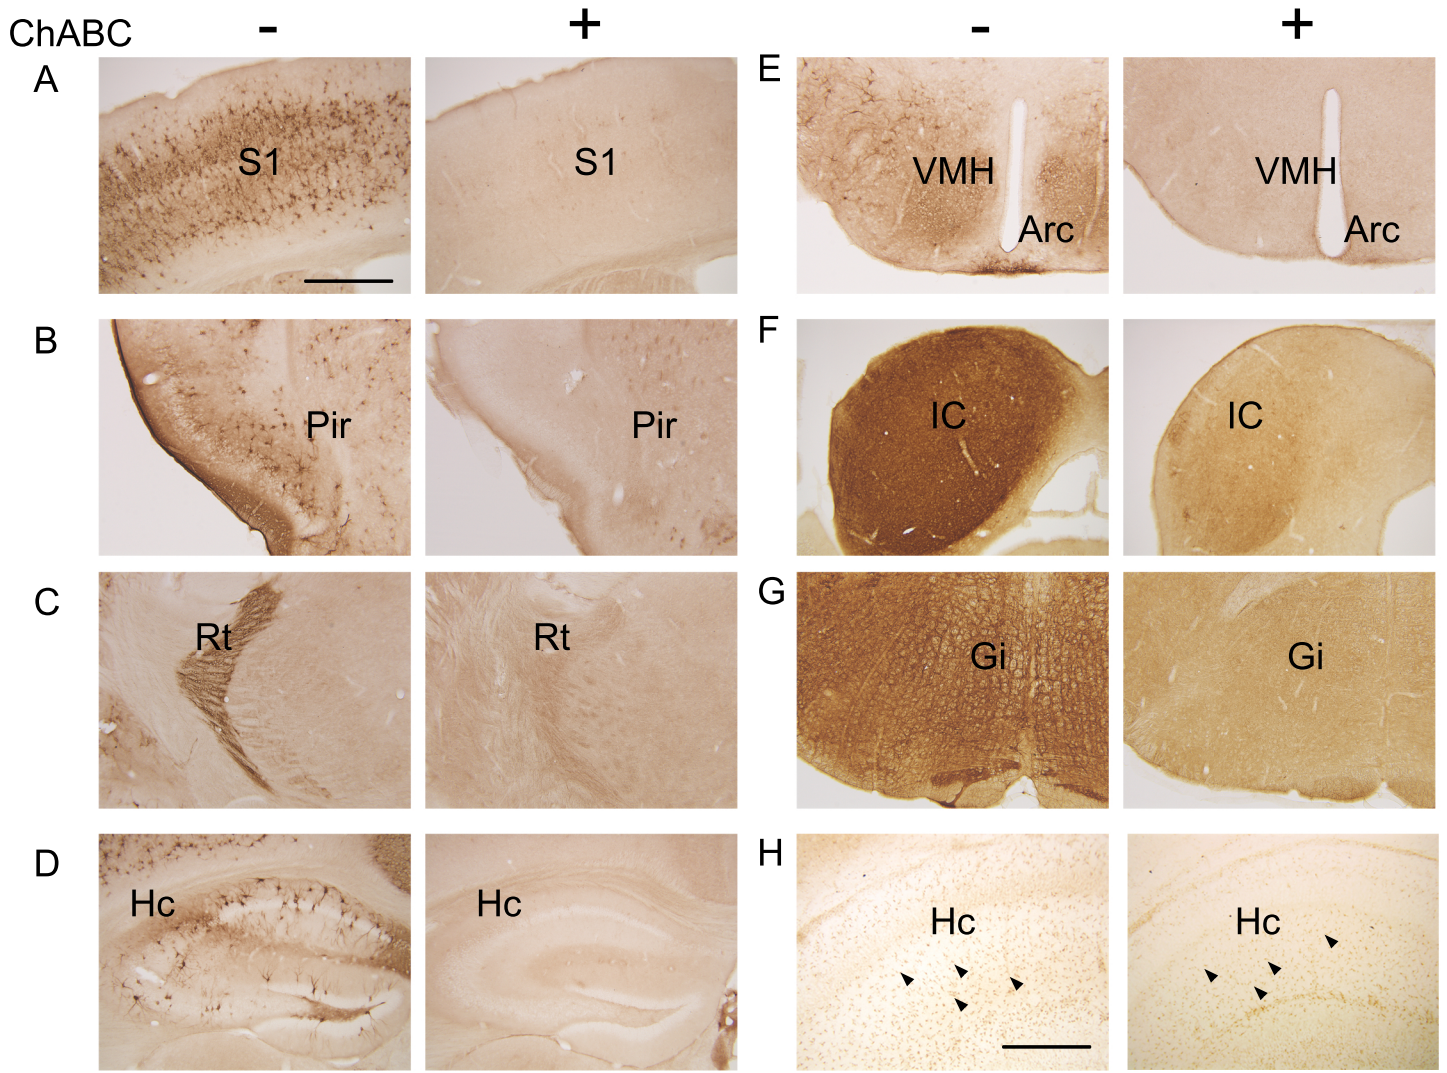

Supplement: f1 [file 256389.f1.pdf]
